1 **Much more than a clasp: Evolutionary pattern of amplexus**

2 **diversity in anurans**

3  
4 Juan D. Carvajal-Castro<sup>1,2\*</sup>, Yelenny López-Aguirre<sup>2</sup>, Ana María Ospina-L<sup>1,2</sup>, Juan C.

5 Santos<sup>3</sup>, Bibiana Rojas<sup>4</sup> and Fernando Vargas-Salinas<sup>2</sup>

6 <sup>1</sup>Instituto de Investigación en Recursos Biológicos Alexander von Humboldt, Bogotá D.C.,  
7 Colombia.

8 <sup>2</sup>Grupo de Investigación en Evolución, Ecología y Conservación (EECO), Universidad del  
9 Quindío, Armenia, Colombia.

10 <sup>3</sup>Department of Biological Sciences, St. John's University, Queens, NY, USA

11 <sup>4</sup>Department of Biology and Environmental Science, University of Jyväskylä, Jyväskylä,  
12 Finland

13 **Corresponding author:** Juan D. Carvajal-Castro, postal address: Cll 22c # 29a-47, Bogotá,  
14 Colombia; telephone:+57 3054784589; e-mail: carvajaljcastro@gmail.com.

15 **Short running title:** Evolution of amplexus diversity in anurans

16 **Manuscript type:** Short Original Article

17

18

## ABSTRACT

19 The evolution and diversification of animal reproductive modes have been pivotal questions  
20 in behavioral ecology. Amphibians present the highest diversity of reproductive modes  
21 among vertebrates, involving various behavioral, physiological and morphological traits. One  
22 of such features is the amplexus, the clasp or embrace of males on females during  
23 reproduction, which is almost universal to anurans. Hypotheses about the origin amplexus are  
24 limited and have not been thoroughly tested, nor had they taken into account evolutionary  
25 relationships in most comparative studies. However, these considerations are crucial to  
26 understand the evolution of reproductive modes. Here, using an evolutionary framework, we  
27 reconstruct the ancestral state of amplexus in 686 anuran species; investigate whether the  
28 amplexus type is a conserved trait; and test whether sexual size dimorphism (SSD) could have  
29 influenced the amplexus type or male performance while clasping females. Overall, we found  
30 evidence of at least 35 evolutionary transitions in amplexus type across anurans. We also  
31 found that amplexus exhibits a high phylogenetic signal (it is conserved across Anura  
32 evolutionary history) and the amplexus type does not evolve in association with SSD. We  
33 discuss the implications of our findings on the diversity of amplexus types across anurans.

34 **Keywords:** Amphibia - ancestral reconstruction – frogs - reproductive modes - sexual  
35 dimorphism.

36

## INTRODUCTION

37 Understanding the evolution and diversification of reproductive modes in animals has been a  
38 shared interest among evolutionary biologists over decades (e.g., Salthe, 1969; Shine, 1983;  
39 Craig, 1987; Alves *et al.*, 1998; Blackburn, 2000; Crespi & Semeniuk, 2004; Haddad &  
40 Prado, 2005). In addition to sexual selection, natural selection promotes reproductive  
41 diversity by favoring modes of reproduction that maximize the likelihood of successful  
42 matings in a given environment (Pianka, 1976; Zamudio *et al.*, 2016). Thus, reproductive  
43 modes are one of the most critical life-history traits directly affecting fitness and survival via  
44 physiological, morphological and behavioral adaptations that increase each individual's  
45 ability to find mates and producing viable offspring, in response to environmental (and other)  
46 selective pressures (Angelini & Ghiara, 1984; Lodé, 2012).

47 Anuran amphibians exhibit one of the highest diversities in reproductive modes among  
48 vertebrates (Duellman & Trueb, 1986; Vitt & Caldwell, 2014). These reproductive modes are  
49 defined as a combination of ecological, developmental and behavioral traits that include  
50 oviposition site, ovule morphology, clutch size, developmental rate, and presence or absence  
51 of (different types of) parental care (Salthe & Duellman, 1973; Duellman & Trueb, 1986).  
52 Thus, anuran reproductive modes exhibit a gradient of parental involvement which ranges  
53 from no or little parental care, involving mostly aquatic oviposition of clutches with hundreds  
54 or thousands of eggs; to elaborate parental care with relatively few terrestrial eggs, decisive  
55 parental involvement or direct development with reduced or absent tadpole stage (Hödl, 1990;  
56 Haddad & Prado, 2005; Crump, 2015).

57 Previous studies have investigated different aspects of the evolution of reproductive modes in  
58 anurans using limited phylogenetic comparative methods (Duellman, 2003; Gomez-Mestre *et*  
59 *al.*, 2012; Zamudio *et al.*, 2016; Furness & Capellini, 2019). These studies have hypothesized

60 that ecological and population structure factors such as desiccation in temporary ponds,  
61 availability of humid microhabitats in terrestrial environments and predation are major  
62 selective forces shaping most reproductive modes. However, to our knowledge, none of these  
63 studies has addressed the evolution of a key behavioral component in frog reproduction: the  
64 amplexus or ‘mating clasp’. Here, we investigate the evolutionary patterns of this trait across  
65 the Anura and reveal major evolutionary transitions in this crucial component of frogs’  
66 reproductive behavior.

67 Amplexus is present in most anuran species and consists of a male grasping a female from  
68 behind with his forelimbs. Thus, not surprisingly, it has been interpreted as a behavior by  
69 which a male ensures the fidelity of its female partner during mating, increasing the chance of  
70 egg fertilization (Duellman & Trueb, 1986; Wells, 2007). Like other mating traits in anurans,  
71 amplexus types are diverse see Fig. 1). For instance, the inguinal amplexus is considered a  
72 basal condition to all anurans, while the axillary amplexus and its variations (including the  
73 lack of amplexus altogether) are considered as derived states (Duellman & Trueb, 1986;  
74 Wells, 2007; Pough *et al.*, 2016). Several hypotheses have been proposed to address the  
75 evolution of such amplexus diversity, suggesting that that variants of the amplexus may have  
76 evolved as a consequence of sexual size dimorphism, parental care and the ecological factors  
77 affecting oviposition site (Duellman & Trueb, 1986; Wells, 2007; Pough *et al.*, 2016).  
78 However, these ideas have not been tested under a phylogenetic framework. Such  
79 comparative analyses could greatly improve our understanding of the evolutionary patterns of  
80 anuran amplexus diversity, and offer new baseline data for further comparative studies about  
81 the behavioral ecology of reproductive modes among vertebrates.

82 Here, we use the most complete phylogeny of Anura (Jetz & Pyron, 2018) to map the origins  
83 and diversification of the known types of amplexus in 686 species with reported records.

84 Furthermore, we explore the relationship between the evolution of amplexus diversity and  
85 sexual dimorphism in body size (measured as female-to-male snout-vent length ratio,  
86 hereafter SSD). We predict that species with a male-biased, little or no SSD, would benefit  
87 from axillary amplexus, whereas species with a high female-biased SSD would likely present  
88 inguinal amplexus or another derived type of amplexus or strategy (e.g. ‘glued’ in Fig. 1).  
89 These predictions are based on the physical restrictions that a very small male could have to  
90 clasp a large female and, hence, to ensure her fidelity during mating. Overall, our results  
91 show that the different types of amplexus, and the lack thereof, are well-defined throughout  
92 the Anura tree of life. This is a fundamental step forward to understanding how  
93 environmental factors and life history have shaped the amazing diversity of reproductive  
94 modes across Anura and other vertebrates.

95

## 96 MATERIAL AND METHODS

### 97 AMPLEXUS CHARACTERIZATION

98 We looked for information on types of amplexus in Anura from primary literature (e.g., peer-  
99 reviewed articles, books) located by using Google Scholar and Web of Science (WoS). We  
100 used “amplexus” and “nupcial clasp” as keywords. Because we obtained an excess of results  
101 unrelated to Anura (the term amplexus has also been used for invertebrates; Conlan, 1991),  
102 we included the keywords “anura” and “frogs”. To further narrow down our search, we also  
103 combined previous keywords with anuran families’ names (e.g., “Amplexus” AND  
104 “Dendrobatidae”). Within the selected publications, we searched for an account describing  
105 male and female behavior with enough detail (e.g. an observational account of the behavior or  
106 photograph) to be assigned to an amplexus type.

107 We defined the documented amplexus types (Fig. 1) following Duellman & Trueb (1986) and  
108 Willaert *et al.*, (2016), but also considering the following clarifications: First, in several  
109 species it has been reported that the amplexus type might change at the moment of  
110 oviposition (e.g. *Anomaloglossus bebei* and *Brachycephalus ephippium*; Bourne *et al.*, 2001,  
111 Pombal *et al.*, 1994; see supplementary material for more examples). In these cases, we  
112 considered the preoviposition amplexus type to be the predominant one (i.e. longer duration  
113 and most frequently reported in literature, as in most cases researchers did not wait until  
114 oviposition for recording breeding behavior). Second, some studies include observations of  
115 multiple types of amplexus for a given species. In these cases, we used the report(s) with the  
116 strongest evidence, which include a textual description of the type of amplexus or visual  
117 evidence such as photographs or videos. Below, we provide a list of some specific examples  
118 of conflicting reports and evidence of new types of amplexus.

119 For *Nyctibatrachus humayumi* (Nyctibatrachidae), it was reported that this species lacks  
120 amplexus (Kunte, 2004), but it was later observed that *N. humayumi* has a dorsal straddle  
121 amplexus (Willaert *et al.*, 2016). In another case, the authors cite a pectoral amplexus for  
122 *Nasikabatrachus sahyadrensis* (Sooglossidae) (Zachariah *et al.*, 2012), but based on the  
123 detailed description by the authors, we consider this behavior to be a new type of amplexus.  
124 We define this clasp as a ‘scapular amplexus’, where the male presses his fists into each side  
125 of the female’s vertebral column. For *Scaphiophryne gottebei* (Microhylidae), the authors  
126 mention an inguinal amplexus, but this account includes several figures showing a  
127 characteristic axillary amplexus (Rosa *et al.*, 2011). For *Osteocephalus* (Hylidae), we used the  
128 ‘gular amplexus’ definition by Jungfer *et al.*, (2013), which refers to a type of amplexus  
129 where the male clasps the female exclusively around her throat. Likewise, some species with  
130 axillary amplexus have been reported to have a ‘glued amplexus’ (e.g. *Elachistocleis bicolor*  
131 (Cacciali, 2010) and *Chiasmocleis leucosticta* (Haddad & Hödl, 1997)). Such reports indicate

132 that the males are ‘glued’ to the female dorsum but, in our analysis, we did not take this  
133 clasping behavior as different from an axillary amplexus. Our consideration is based on the  
134 fact that males of species with axillary amplexus have not been examined thoroughly enough  
135 for the presence or absence of glands to suggest that these organs exist, or produce sticky or  
136 glue-like substances. For species like *Nyctibatrachus aliciae* (Nyctibatrachidae, Biju *et al.*,  
137 2011) or *Mantella aurantiaca* (Mantellidae, Vences, 1999, Glaw & Vences, 2007), the  
138 observed amplexus consists of a male sitting on the dorsum of the female by a short period of  
139 time, without an actual clasp; we classified such observations as ‘loose amplexus’. Lastly,  
140 *Aplastodiscus leucopygius* (Hylidae) and *Ascaphus truei* (Ascaphidae) have a ‘dynamic  
141 amplexus’, which is difficult to categorize because at different moments the same pair (i.e.  
142 male and female) exhibits diverse amplexus positions (Stephenson & Verrell 2003; Berneck  
143 *et al.* 2017). Therefore, these two species were not included in our analysis.

144 We completed the life history characterization for all species with amplexus data by including  
145 male and female body size (i.e. snout-vent-length, SVL) and sexual size dimorphism (SSD).  
146 In cases where only the range of body size was available, we used the median values.

147

## 148 COMPARATIVE METHODS

149 For the phylogenetic analysis, we obtained 1000 random phylogenies based only on genetic  
150 data from Jetz & Pyron (2018). Then, we ran the analysis 1000 times to evaluate the  
151 robustness and include uncertainty in topologies in the R software environment (R Core  
152 Team, 2018). Later, we made a stochastic ancestral reconstruction (Bollback, 2006) of the  
153 character “type of amplexus” using 1000 trees, with the *make.simmap* function in ‘phytools’  
154 R-package version 0.6-99 (Revell, 2012) which is a best-fit character evolution model (Only  
155 with 100 trees). We contemplate an “Equal Rate model” (ER), which assumes that all

156 transitions between traits occur at the same rate (Pagel 1994; Lewis 2001); and an “All-Rate-  
157 Different model” (ARD), which assumes that all transitions between traits occur at different  
158 rates (Paradis *et al.*, 2004). We used the *fitDiscrete* function in the ‘geiger’ R-package (v.  
159 2.0.6.2; Harmon *et al.*, 2007) to compare the ER and ARD models, and selected the model  
160 with the lowest AICc value. We did not generate fully-sampled phylogenies using the  
161 taxonomic imputation method to make our ancestral character reconstruction because this  
162 approximation has been demonstrated to be inappropriate for this kind of analysis due to  
163 increased bias (Rabosky, 2015; Rocha *et al.*, 2016; Jetz & Pyron 2018).

164 To test whether the type of amplexus and SSD are conserved or labile (convergent) traits, we  
165 calculated their phylogenetic signal. This property is defined as the tendency of traits in  
166 related species to resemble each other more as a consequence of shared ancestry (Blomberg &  
167 Garland 2003). For this purpose, we used the statistic lambda ( $\lambda$ ) proposed by Pagel (1997,  
168 1999) as a measurement of phylogenetic signal. The  $\lambda$  value varies from 0 to 1; if  $\lambda \sim 1$ , it  
169 indicates a strong phylogenetic signal (i.e. conserved trait), whereas if  $\lambda \sim 0$ , it indicates that  
170 the evolution pattern of the trait has been random or convergent; that is, these characters lack  
171 phylogenetic signal (Gómez *et al.*, 2010, Kraft *et al.*, 2007; Revell *et al.*, 2008). Calculation  
172 of the phylogenetic signal for type of amplexus was made using the *fitDiscrete* function of  
173 ‘geiger’ R-package. In addition, we calculated the likelihood of a model with no phylogenetic  
174 signal and the maximum likelihood value of  $\lambda$ ; later we used a likelihood ratio test to compare  
175 these two models and calculate a p-value (significance alpha 0.05) under a chi-square  
176 distribution. For SDD, phylogenetic signal was tested with the *phylosig* function in ‘phytools’  
177 (Revell, 2012).

178 To test whether the evolution rates of type of amplexus have increased or slowed over time,  
179 we used a delta model in *fitDiscrete* function of ‘geiger’. In addition, we calculate the



180 likelihood of a model with delta equal to one and a model with observed delta; later we used a  
181 likelihood ratio test to compare these two models and calculated a p-value (significance alpha  
182 0.05) under a chi-square distribution. If delta statistic  $> 1$ , this indicates that recent evolution  
183 has been relatively fast; in contrast, if delta  $\leq 1$ , it indicates that recent evolution has been  
184 relatively slow. Because the difference in body size between males and females could  
185 promote changes in types of amplexus due to mechanic incompatibility (e.g., small males  
186 might not physically clasp a large female), we used a phylogenetic ANOVA to compare  
187 sexual size dimorphism across different types of amplexus. This analysis was performed  
188 using the *phylANOVA* function in 'phytools'.

189

190

## RESULTS

191 Our analyses included 686 species from 46 anuran families (Table S1). The distribution of  
192 species in our dataset comprised all continents where amphibians are present. Most families  
193 (i.e. 35 families) have only one type of amplexus, while 11 families have more than one (Fig.  
194 2, Table S1). The average SSD is  $1.17 \pm 0.16$  (range = 0.70-1.85; n= 478 species), and it  
195 varies between anuran species and families (Fig. 2, Table S1); in 42 species (8.78%) male  
196 body size is larger than female body size, while in most cases (429 species, 89.74%) the  
197 female is larger than the male; in the remaining seven species (1.46%) males and females  
198 exhibit similar body size.

199 For the ancestral reconstruction of types of amplexus, we chose the ER model ( $LnL=$  -  
200 227.438,  $AIC=456.882$ ) over ARD model ( $LnL=-165.484$ ,  $AIC= 538.497$ ) based on the lowest  
201  $AICc$  value (Fig. 3). Our results support the inguinal amplexus as the basal state to all Anura.  
202 For instance, Ascaphidae and other basal frog families (e.g., Leiopelmatidae, Bombinatoridae,  
203 Alytidae, Pipidae) present inguinal amplexus. The axillary amplexus was found to be the

204 most frequent state, occurring in 540 out of the 686 species (i.e. 78.72%). However, we found  
205 35 evolutionary transitions between all type of amplexus across the whole Anura phylogeny  
206 (Fig. 4A). The greatest number of evolutionary transitions (i.e., 12) occurred between axillary  
207 and inguinal amplexus states (Fig. 4A). Likewise, we found a strong phylogenetic signal  
208 amplexus (Pagel's  $\lambda = 0.963$ ,  $P < 0.0001$ ). In contrast, we found that SSD has a weak  
209 phylogenetic signal (Pagel's  $\lambda = 0.266$ ,  $P = 0.043$ ). We also found that the delta value is equal  
210 to 0.694 (SD = 0.208), but when we compare it with a model with delta equal to 1, we found  
211 no differences ( $P = 0.63$ ). Furthermore, we did not find differences in SSD across types of  
212 amplexus ( $F = 1.2086$ ,  $P = 0.4215$ ,  $n = 478$ ; Fig. 4B).

213

214

## DISCUSSION

215 Different selective pressures are known to shape the behavioral, physiological and physical  
216 traits that characterize the diverse reproductive modes and behaviors in anurans (and fishes)  
217 in comparison to other vertebrates. One of s traits is the amplexus, whose evolutionary trends  
218 we characterized using a comparative phylogenetic framework. For this purpose, we explored  
219 the relationship between the different types of amplexus (or lack thereof) and sexual size  
220 dimorphism. Below, we discuss the implications of our findings and generate testable  
221 hypotheses for future research on the evolution of reproductive modes in anurans.

222 We found a significant phylogenetic signal in amplexus. This result was anticipated,  
223 considering that the amplexus is an aspect of the anuran reproductive behavior that is  
224 expected to have been shaped by other various factors not related to reproduction (e.g.  
225 morphology, microhabitat; Duellman and Trueb 1986, Wells 2007). Likewise, it is presumed  
226 that the type of amplexus affects the reproductive success of males and females in several  
227 ways. For example, the type of amplexus determines the proximity of cloacas between males

228 and females and, possibly, the success of egg fertilization (Davis and Halliday 1979; Wells  
229 2007). Altogether, we infer that any change between types of amplexus requires several  
230 selective factors to act in tandem and weighed by their combined selective force. While we  
231 found a slight indication of a slow down in the rate evolution of amplexus (delta value equal  
232 to 0.694), this was not supported when we tested if this parameter estimate was different from  
233  $\delta = 1$ . In other words, the amplexus rate of change follows a Brownian motion model  
234 which does not support a slow-down, but rather a random change (either slow-down or  
235 acceleration) in its rate of evolution through the evolutionary history of Anura.

236 In contrast to amplexus type, the weak phylogenetic signal in SSD suggests that  
237 selective forces might be promoting body size disparities to be the result of convergent  
238 evolution across Anura. For instance, in most frogs, females are larger than males because  
239 there is a strong positive relationship between fecundity and body size (i.e., selection favors  
240 larger size in females); in contrast, a larger body size in males is not necessarily tied to higher  
241 attractiveness to females or higher dominance across species (Halliday and Tejedo 1995;  
242 Wells 2007).

243 Previous reports support our results that all basal lineages (e.g., Ascaphidae, Pipidae,  
244 and Myobatrachidae) have an inguinal amplexus (Lynch, 1973; Rabb, 1973; Weygoldt,  
245 1976), which we found to be the ancestral state across anurans. Likewise, axillary amplexus  
246 appears to have been derived from the inguinal type, as hypothesized by others (Duellman &  
247 Trueb, 1986; Wells, 2007; Vitt & Caldwell, 2014; Pough *et al.*, 2016). Most importantly, our  
248 analysis revealed that at least 35 transitions have occurred between amplexus types across the  
249 anuran phylogeny. Notably, we found that transitions from axillary to other type(s) of  
250 amplexus have occurred in high frequency (i.e., at least 18 times). These results suggest that

251 axillary amplexus might be a key intermediate type that eventually diversified in almost all  
252 other amplexus types.

253 Axillary amplexus is the most widespread type across Anura and, according to our  
254 analysis, it evolved at least three independent times from the ancestral inguinal amplexus. The  
255 prevalence of axillary amplexus suggests its high versatility in different ecological contexts  
256 that can effectively relate to the reproductive success of males. For instance, in many species,  
257 especially those denominated by explosive breeders where males and females congregate to  
258 reproduce (Wells, 1977), it is common to find uncoupled males trying to get off amplexant  
259 males from the dorsum of their partners (Halliday & Tejedo, 1995; Wells, 2007; see video S1  
260 for an example in *Rhinella castaneotica* (Caldwell, 1991)). In this context, amplexant males  
261 would benefit from grasping the female as strongly as possible and only the axillary amplexus  
262 is the most effective (see Lee & Corrales, 2002; Vargas-Salinas, 2005 for an example with  
263 *Rhinella marina* (Linnaeus, 1758)). Intrasexual competition between males may also favor  
264 axillary amplexus where the intense competition during short breeding seasons results in the  
265 evolution or persistence of traits that reinforce mate guarding behavior by males (e.g. axillary  
266 amplexus plus been glued). In contrast, most other types of amplexus might be related to taxa  
267 with prolonged breeding seasons where amplexant males are exposed to lower risks of being  
268 displaced by competing males (Duellman & Trueb, 1986; Wells, 2007; Willeart *et al.*, 2016).

269 If the evolution of the axillary amplexus has been so successful, and this type of  
270 amplexus is so versatile, what could promote the evolution of other types of amplexus?  
271 Furthermore, why do reversions to the inguinal amplexus occur? Surely, the type of amplexus  
272 in a given species or clade has been shaped by multiple environmental, physiological and  
273 morphological factors and particular social contexts (see possible scenarios below). This  
274 pattern is also true for other aspects of reproductive modes, and likely applicable to vertebrate

275 groups other than amphibians. Testing all the possible scenarios is beyond the scope of this  
276 study, but we propose some inferences, as follows. For example, effective antipredator  
277 chemical defenses (i.e., toxic alkaloids) such as those in Dendrobatidae (poison frogs) can  
278 promote amplexus diversification. Several lineages of poison frogs have evolved aposematic  
279 coloration (Santos *et al.*, 2003; Rojas, 2017), which is associated with a high diversification in  
280 acoustic communication signals as an alleged indirect effect of a reduction in predation  
281 pressure (Santos *et al.*, 2014); thus, aposematism could also allow an increase in the  
282 complexity of courtship behaviors, promoting matings where axillary amplexus is not  
283 necessary. Our results support such intuition, as at least 22 dendrobatid species exhibit  
284 cephalic amplexus, whereas 18 species exhibit no amplexus (Weygoldt, 1987; Castillo-Trenn  
285 & Coloma, 2008). Moreover, most species of Dendrobatidae are prolonged breeders (Wells,  
286 1977), mostly terrestrial, highly territorial and whose oviposition occurs in hidden places  
287 under leaf litter and tree roots (Wells, 1978; Pröhl, 2005; Summers & Tumulty, 2014; Rojas &  
288 Pašukonis, 2019). Under these conditions, it might be assumed that aposematic males have  
289 fewer risks of predation and losing a female, attracted via acoustic and visual signals, because  
290 of the action of an intruder male (Zamudio *et al.*, 2016). Thus, aposematic species could  
291 evolve complex mating behaviors and diversity of amplexus types if the cost of predation is  
292 minimized. In contrast, species that rely on avoiding detection by predators may have evolved  
293 mating strategies that offer a balance between attracting females and avoiding enemies.

294         Microhabitat, or the environment context where males court, is an important factor  
295 often overlooked in discussions about the evolution of amplexus diversity. Axillary amplexus  
296 may function well in diverse microhabitats (arboreal, terrestrial, aquatic; see Fig. S1). In  
297 arboreal species, for example, when a female jumps from leaf to leaf or across branches, a  
298 male clasping her in an axillary amplexus would not prevent her from achieving the highest  
299 jumping performance; thus this kind of amplexus would be selectively advantageous. A

300 similar performance in arboreal microhabitats would be difficult for inguinal or cephalic  
301 amplexus, as the movement of the male's body during jumping would be erratic and  
302 unbalanced with respect to that of the female's. This hypothesis warrants further investigation  
303 from the perspective of the functional association, e.g., between locomotor performance and a  
304 specific amplexus type in a particular microhabitat. Likewise, performance experiments  
305 would be required to account for the diameter, inclination and type of substrate, which  
306 significantly affect the kinematics of locomotion and thus select for specific morphologies  
307 and behaviors across a variety of taxa (Andersson, 1994; Losos, 2009; Herrel *et al.*, 2013).

308         We found a few instances of reversal from the axillary to the inguinal amplexus. A  
309 possible explanation for such transitions is that inguinal amplexus promoted morphological  
310 adaptations related to thermoregulation (Ashton, 2002; Meiri & Dayan, 2003; Zamora-  
311 Camacho *et al.*, 2014). Alternatively, the evolutionary interpretation of such rare transition  
312 may be an adaptation to fossorial habits (e.g., Microhylidae and Hyperoliidae). In animals  
313 with inguinal amplexus, this behavior allows the female to avoid digging a wider burrow on  
314 the ground (Duellman & Trueb, 1986). We hypothesize that this mechanical limitation might  
315 explain the evolution of this type of amplexus in *Osornophryne*, a genus of toads with  
316 relatively short limbs and distributed in middle and high elevations in the Andes of South  
317 America (Frost, 2019). As these species are adapted to cold climates, their globular body  
318 shape and short legs require a type of amplexus that provides a better grasping potential for  
319 males.

320         Contrary to our predictions, we found no relationship between sexual size dimorphism  
321 (SSD) and type of amplexus. Differences in body size between the sexes can impose physical  
322 restrictions to males for clasping females in a way that cloacas are aligned and egg  
323 fertilization is optimized (Davis & Halliday, 1977; Ryan, 1985; Robertson, 1990; Bourne,

324 1992). Moreover, differences in body size between sexes could reduce the strength with  
325 which a male can clasp a female, hence reducing a male's likelihood of being displaced by  
326 competing males (Brunning *et al.*, 2010). It is possible that amplexus type is related to sexual  
327 dimorphism in body shape, or the interaction between body shape and size, rather than size  
328 dimorphism alone. For instance, in species with globular bodies and short limbs (e.g. genus  
329 *Breviceps*; *Nasikabatrachus sahyadrensis*), the axillary amplexus is mechanically less  
330 feasible. In such species, the male is often very small with respect to the female and, thus, the  
331 evolution of "alternative strategies" to enhance amplexus may have been advantageous. We  
332 propose that the evolution of mucus skin secretions could have increased the effectiveness of  
333 gamete transfer in the absence of an actual clasp.

334 Compared to other amphibian orders, our results reveal some interesting differences. For  
335 instance, a recent study involving 114 salamandrid species reports that the ancestral states for  
336 this clade were mating on land, oviparity and absence of amplexus (Kieren *et al.*, 2018). The  
337 authors further suggest that the presence or absence of amplexus might be unrelated with the  
338 mating habitat. Our results suggest that anurans exhibit many more reproductive modes as a  
339 consequence of a higher species diversity, diverse morphology and more diverse reproductive  
340 strategies (Hutter *et al.*, 2017; Vitt & Caldwell, 2014; Frost, 2019). Furthermore, this  
341 diversity increases towards tropical regions (e.g., Duellman, 1988; Hödl, 1990; Haddad &  
342 Prado, 2005). Therefore, complex habitats such as the tropics may offer more opportunities  
343 for adaptation in the context of reproductive characteristics, where environmental conditions  
344 affect the evolutionary patterns of amplexus diversity. This habitat complexity may have also  
345 influenced the reproductive mode diversity found in other ectothermic vertebrates.

346 The type of amplexus in anurans, or the lack thereof, is related to behavioral features that  
347 clearly can affect the reproductive success of individuals (Duellman & Trueb, 1986, Wells,

348 2007; Buzatto *et al.*, 2017). Our findings highlight not only the value of implementing  
349 phylogenetic comparative approaches for recording the evolutionary history of reproductive  
350 traits in vertebrates, but also the importance of doing detailed field observations of  
351 reproductive behavior and natural history. Precisely the lack or infrequency of such kind of  
352 reports is one of the main difficulties faced by researchers aiming to do analysis like ours on  
353 amphibians and other taxa. Surely, the diversity of amplexus and associated behaviors is  
354 much higher than what has been reported to date in the scientific literature, not only among  
355 species but even at intraspecific level (Pombal *et al.*, 1994; Stephenson & Verrell, 2003;  
356 Berneck *et al.*, 2017). Our study represents a unique large dataset on amplexus types for  
357 anurans, and allows to highlight three amplexus types (loose amplexus, gular amplexus,  
358 scapular amplexus) that have been overlooked in key literature references (i.e. Duellman &  
359 Trueb, 1986; Wells, 2007; Vitt & Caldwell, 2014; Pough *et al.*, 2016; Willaert *et al.*, 2016).  
360 We hope that further studies about breeding behavior in anurans include detailed observations  
361 and descriptions that could reveal novelty aspects associated to diversity of breeding  
362 strategies in vertebrates, even in those lineages considered as well studied.

363

364

#### ACKNOWLEDGEMENTS

365 JDCC and AMOL thank the Humboldt Institute for logistical support, FVS and YLA are  
366 grateful to Universidad del Quindío for support, BR is funded by the Academy of Finland  
367 (Academy Research Fellowship No. 21000042021), JCS was supported by start-up funds  
368 from SJU. Special thanks to M.P. Toro for help with Figure 2. We are grateful to J. Valkonen,  
369 S. Casas, L.A. Rueda-Solano, J. A. Allen and two anonymous reviewers for general feedback  
370 and constructive comments on previous versions of this manuscript.



371

## Supplementary data

372 Table S1 and references, Video S1, and table S2 can be found in DOI:  
373 10.6084/m9.figshare.11050685

374

375

## REFERENCES

376 **Alves MJ, Coelho MM, Collares-Pereira MJ. 1998.** Diversity in the reproductive modes of  
377 females of the *Rutilus alburnoides* complex (Teleostei, Cyprinidae): a way to avoid the  
378 genetic constraints of uniparentalism. *Molecular Biology and Evolution* **15**:1233-1242.

379 **Angelini F, Ghiara G. 1984.** Reproductive modes and strategies in vertebrate evolution.  
380 *Italian Journal of Zoology* **51**:121-203.

381 **Ashton KG. 2002.** Do amphibians follow Bergmann's rule? *Canadian Journal of Zoology*  
382 **80**:708-716.

383 **Berneck BVM, Segalla MV, Haddad CFB. 2017.** A first observation of amplexus in  
384 *Aplastodiscus* (Anura; Hylidae). *Herpetology notes* **10**: 351-354.

385 **Blackburn DG. 2000.** Classification of the reproductive patterns of amniotes. *Herpetological*  
386 *Monographs* **14**:371-377.

387 **Blomberg SP, Garland JrT, Ives AR. 2003.** Testing for phylogenetic signal in comparative  
388 data: behavioral traits are more labile. *Evolution* **57**:717-745.

389 **Bollback JP. 2006.** SIMMAP: stochastic character mapping of discrete traits on phylogenies.  
390 *BMC Bioinformatics* **7**:88.

- 391 **Bourne GR. 1992.** Lekking behavior in the Neotropical frog *Ololygon rubra*. *Behavioral*  
392 *Ecology and Sociobiology* **31**:173-180.
- 393 **Bourne GR, Collins AC, Holder AM, McCarthy CL. 2001.** Vocal communication and  
394 reproductive behavior of the frog *Colostethus beebei* in Guyana. *Journal of*  
395 *Herpetology* **35**: 272-281.
- 396 **Bruning B, Phillips BL, Shine R. 2010.** Turgid female toads give males the slip: a new  
397 mechanism of female mate choice in the Anura. *Biology Letters* **6**:322-324.
- 398 **Buzatto BA, Thyer EM, Roberts JD, Simmons LW. 2017.** Sperm competition and the  
399 evolution of precopulatory weapons: testis size and amplexus position, but not arm  
400 strength, affect fertilization success in a chorusing frog. *Evolution* **71**:329-341.
- 401 **Cacciali P. 2010.** Mortalidad en puestas de *Elachistocleis bicolor* (Microhylidae: Anura), en  
402 charcos temporales en Paraguay. *Kempffiana* **6**:31-37.
- 403 **Castillo-Trenn P, Coloma LA. 2008.** Notes on behaviour and reproduction in captive  
404 *Allobates kingsburyi* (Anura: Dendrobatidae), with comments on evolution of  
405 reproductive amplexus. *International zoo yearbook*, 42:58-70.
- 406 **Conlan KE. 1991.** Precopulatory mating behavior and sexual dimorphism in the amphipod  
407 Crustacea. In VIIth International Colloquium on Amphipoda Springer, Dordrecht.
- 408 **Craig C.L. 1987.** The significance of spider size to the diversification of spider-web  
409 architectures and spider reproductive modes. *The American Naturalist* **129**:47-68.
- 410 **Crespi B, Semeniuk C. 2004.** Parent-offspring conflict in the evolution of vertebrate  
411 reproductive mode. *The American Naturalist* **163**:635-653.

- 412 **Crump ML. 2015.** Anuran reproductive modes: evolving perspectives. *Journal of*  
413 *Herpetology* **49**: 1-16.
- 414 **Davies N, Halliday T. 1977.** Optimal mate selection in the toad *Bufo bufo*. *Nature* **269**: 56-  
415 58.
- 416 **Duellman WE, Trueb L. 1986.** *Biology of Amphibians*. Baltimore: The Johns Hopkins  
417 University Press.
- 418 **Duellman WE. 1988.** Patterns of species diversity in anuran amphibians in the American  
419 tropics. *Annals of the Missouri Botanical Garden* **75**:79-104.
- 420 **Duellman WE 2003.** An overview of anuran phylogeny, classification, and reproductive  
421 modes. In: Jamieson BG Med Reproductive Biology and Phylogeny of Anura. Enfield,  
422 NH: Science.
- 423 **Frost DR. 2019.** Amphibian Species of the World: an Online Reference. Version 6.0 (Date of  
424 access). Electronic Database accessible at  
425 <http://research.amnh.org/herpetology/amphibia/index.html>. American Museum of  
426 Natural History, New York, USA.
- 427 **Furness AI, Capellini I. 2019.** The evolution of parental care diversity in amphibians.  
428 *Nature Communications* **10**:1-12.
- 429 **Glaw F, Vences M. 2007.** A field guide to the amphibians and reptiles of Madagascar.
- 430 **Gomez JM, Verdú M. Perfectti F. 2010.** Ecological interactions are evolutionarily  
431 conserved across the entire tree of life. *Nature* **465**:918–922

- 432 **Gomez-Mestre I, Pyron RA, Wiens JJ. 2012.** Phylogenetic analyses reveal unexpected  
433 patterns in the evolution of reproductive modes in frogs. *Evolution: International*  
434 *Journal of Organic Evolution* **66**: 3687-3700.
- 435 **Griffith OW, Blackburn DG, Brandley MC, Van Dyke JU, Whittington CM, Thompson**  
436 **MB. 2015.** Ancestral state reconstructions require biological evidence to test  
437 evolutionary hypotheses: a case study examining the evolution of reproductive mode in  
438 Squamate reptiles. *Journal of Experimental Zoology Part B: Molecular and*  
439 *Developmental Evolution* **324**: 493-503.
- 440 **Haddad CFB, Hödl W. 1997.** New reproductive mode in anurans: bubble nest in  
441 *Chiasmocleis leucosticta* (Microhylidae). *Copeia* **1997**:585-588.
- 442 **Haddad CF, Prado CP. 2005.** Reproductive modes in frogs and their unexpected diversity in  
443 the Atlantic Forest of Brazil. *BioScience* **55**: 207-217.
- 444 **Halliday T, Tejedo M. 1995.** Intrasexual selection and alternative mating behaviour. In:  
445 Heatwole H, Sullivan B, eds. *Amphibian biology. Volume 2: Social behaviour.*  
446 Chipping Norton: Surrey Beatty & Sons, 419-468.
- 447 **Harmon LJ, Weir JT, Brock CD, Glor RE, Challenger W. 2007.** GEIGER: investigating  
448 evolutionary radiations. *Bioinformatics* **24**:129-131.
- 449 **Herrel A, Perrenoud M, Decamps T, Abdala V, Manzano A, Pouydebat E. 2013.** The  
450 effect of substrate diameter and incline on locomotion in an arboreal frog. *Journal of*  
451 *Experimental Biology*, 216:3599-3605.
- 452 **Hödl W. 1990.** Reproductive diversity in Amazonian lowland frogs. *Fortschritte der*  
453 *Zoologie* **38**: 41-60.

- 454 **Hutter CR, Lambert SM, Wiens JJ. 2017.** Rapid diversification and time explain  
455 amphibian richness at different scales in the Tropical Andes, Earth's most biodiverse  
456 hotspot. *The American Naturalist* **190**: 828-843.
- 457 **Jetz W, Pyron RA. 2018.** The interplay of past diversification and evolutionary isolation  
458 with present imperilment across the amphibian tree of life. *Nature ecology & evolution*  
459 **2**:850
- 460 **Jungfer K, Faivovich J, Padial JM, Castroviejo-Fisher S, Lyra MM, Berneck BVM,**  
461 **Haddad CFB, Iglesias PP, Kok P, MacCulloch RD, Rodrigues MT, Verdade VK,**  
462 **Gastello CPT, Chaparro JC, Valdujo PH, Reichle S, Moravec J, Gvozdik V,**  
463 **Gagliardi-Urrutia G, Ernst R, Riva IDI, Means DB, Lima AP, Señaris JC, Wheeler**  
464 **WC. 2013.** Systematics of spiny-backed treefrogs (Hylidae: *Osteocephalus*): an  
465 Amazonian puzzle. *Zoologica Scripta* **42**: 351-380.
- 466 **Kieren S, Sparreboom M, Hochkirch A, Veith M. 2018.** A biogeographic and ecological  
467 perspective to the evolution of reproductive behaviour in the family Salamandridae.  
468 *Molecular Phylogenetics and Evolution* **121**: 98-109.
- 469 **Kraft NJB, Cornwell WK, Webb CO, Ackerly DD. 2007.** Trait evolution, community  
470 assembly, and the phylogenetic structure of ecological communities. *American*  
471 *Naturalist* **170**:271 –283.
- 472 **Kunte K. 2004.** Natural history and reproductive behavior of *Nyctibatrachus* cf. *humayuni*  
473 (Anura: Ranidae). *Herpetological Review* **35**: 137–140.
- 474 **Lee JC, Corrales AD. 2002.** Sexual dimorphism in hind-limb muscle mass is associated with  
475 male reproductive success in *Bufo marinus*. *Journal of Herpetology* **36**: 502-505.

- 476 **Lewis PO. 2001.** A likelihood approach to estimating phylogeny from discrete morphological  
477 character data. *Systematic biology* **50**: 913-925.
- 478 **Lodé T. 2012.** Oviparity or viviparity? That is the question.... *Reproductive Biology* **12**: 259-  
479 264.
- 480 **Losos JB. 2009.** Lizards in an evolution tree: ecology and adaptive radiation of anoles.  
481 University of California Press: 1-528
- 482 **Lötters S, Mutschmann F. 2007.** Poison Frogs: Biology, Species and Captive Care. Edition  
483 Chimaira.
- 484 **Lynch JD. 1973.** The transition from archaic to advanced frogs. *Evolutionary Biology of the*  
485 *Anurans: Contemporary Research on Major Problems* **133**: 182.
- 486 **Meiri S, Dayan T. 2003.** On the validity of Bergmann's rule. *Journal of Biogeography*  
487 **30**:331-351.
- 488 **Pagel M. 1994.** Detecting correlated evolution on phylogenies: a general method for the  
489 comparative analysis of discrete characters. *Proceedings of the Royal Society of*  
490 *London. Series B: Biological Sciences* **255**: 37-45.
- 491 **Pagel M. 1997.** Inferring evolutionary processes from phylogenies. *Zoologica Scripta*  
492 **26**:331–348.
- 493 **Pagel M. 1999.** Inferring the historical patterns of biological evolution. *Nature* **401**:877–884
- 494 **Paradis E, Claude J, Strimmer K. 2004.** APE: analyses of phylogenetics and evolution in  
495 R language. *Bioinformatics* **20**:289-290.

496 **Pianka ER. 1976.** Natural selection of optimal reproductive tactics. *American Zoologist*  
497 **16:**775-784.

498 **Pombal JP, Sazima I, Haddad CF. 1994.** Breeding behavior of the Pumpkin toadlet,  
499 *Brachycephalus ephippium* (Brachycephalidae). *Journal of Herpetology* **28:** 516-519.

500 **Pough FH, Andrews RM, Crump ML, Savitzky AH, Wells KD, Brandley MC. 2016.**  
501 *Herpetology* (4th ed.). Sunderland: Sinauer Associates, Inc.

502 **Prohl H. 2005.** Territorial behavior in dendrobatid frogs. *Journal of Herpetology* **39:** 354-  
503 365.

504 **Rabb GB. 1973.** Evolutionary aspects of the reproductive behavior of frogs. *Evolutionary*  
505 *Biology of the Anurans:* 213e227.

506 **Rabosky DL. 2015.** No substitute for real data: a cautionary note on the use of phylogenies  
507 from birth–death polytomy resolvers for downstream comparative analyses. *Evolution*  
508 **69:** 3207-3216.

509 **R Core Team. 2018.** R: A language and environment for statistical computing. R foundation  
510 for Statistical Computing, Vienna, Austria.

511 **Revell LJ, Harmon LJ, Collar DC. 2008.** Phylogenetic signal, evolutionary process, and  
512 rate. *Systematic biology* **57:**591-601.

513 **Revell LJ. 2012.** Phytools: an R package for phylogenetic comparative biology (and other  
514 things). *Methods in Ecology and Evolution* **3:** 217-223.

515 **Robertson JG. 1990.** Female choice increases fertilization success in the Australian frog,  
516 *Uperoleia laevigata*. *Animal Behaviour* **39:** 639-645.

- 517 **Rojas B. 2017.** Behavioural, ecological, and evolutionary aspects of diversity in frog colour  
518 patterns. *Biological Reviews* **92**: 1059-1080.
- 519 **Rojas B, Pašukonis A. 2019.** From habitat use to social behavior: natural history of a  
520 voiceless poison frog, *Dendrobates tinctorius*. *PeerJ* **7**:e7648.
- 521 **Rosa GM, Mercurio V, Crottini A, Andreone. F. 2011.** Explosion into the canyon: an  
522 insight into the breeding aggregation of *Scaphiophryne gottlebei* Busse & Bohme, 1992.  
523 *North-Western Journal of Zoology* **7**: 329-333.
- 524 **Ryan MJ. 1985.** *The túngara frog: a study in sexual selection and communication*.  
525 University of Chicago Press.
- 526 **Salthe SN. 1969.** Reproductive modes and the number and sizes of ova in the urodeles. *The*  
527 *American Midland Naturalist* **81**:467-490.
- 528 **Salthe SN, Duellman WE. 1973.** Quantitative constraints associated with reproductive mode  
529 in anurans. In J. L. Vial (ed.), *Evolutionary Biology of Anurans: Contemporary*  
530 *Research on Major Problems*, Univ, Missouri Press, Columbia.
- 531 **Santos JC, Baquero M, Barrio-Amorós C, Coloma LA, Erdtmann LK, Lima AP,**  
532 **Cannatella DC. 2014.** Aposematism increases acoustic diversification and speciation in  
533 poison frogs. *Proceedings of the Royal Society B: Biological Sciences* **281**: 20141761.
- 534 **Santos JC, Coloma LA, Cannatella DC. 2003.** Multiple, recurring origins of aposematism  
535 and diet specialization in poison frogs. *Proceedings of the National Academy of*  
536 *Sciences* **100**: 12792-12797.
- 537 **Shine R. 1983.** Reptilian reproductive modes: the oviparity-viviparity continuum.  
538 *Herpetologica* **39**:1-8.



- 539 **Stephenson B, Verrell P. 2003.** Courtship and mating of the tailed frog (*Ascaphus truei*).  
540 *Journal of Zoology*, **259**:15-22.
- 541 **Summers K, Tumulty J. 2014.** Parental care, sexual selection, and mating systems in  
542 neotropical poison frogs. In: Macedo RH, Machado G, eds. *Sexual selection.*  
543 *Perspectives and models from the Neotropics*. London: Academic Press, 289-320.
- 544 **Vargas-Salinas F. 2005.** *Bufo marinus* (Cane toad). Amplexus displacement. *Herpetological*  
545 *Review* **36**: 431-432.
- 546 **Vences M, Glaw F, Bohme W. 1999.** A review of the genus *Mantella* (Anura, Ranidae,  
547 Mantellinae): taxonomy, distribution and conservation of Malagasy poison frogs. *Alytes*  
548 **17**:3-72.
- 549 **Vitt LJ, Caldwell JP. 2014.** *Herpetology: an introductory biology of amphibians and*  
550 *reptiles*. Fourth edition. Academic Press.
- 551 **Wells KD. 1977.** The social behaviour of anuran amphibians. *Animal Behaviour*, **25**:666-693.
- 552 **Wells KD. 1978.** Courtship and parental behavior in a Panamanian poison-arrow frog  
553 (*Dendrobates auratus*). *Herpetologica* **34**: 148-155.
- 554 **Wells KD. 2007.** *The Ecology and Behavior of Amphibians*. University of Chicago Press.
- 555 **Weygoldt P. 1976.** Beobachtungen zur Biologie und Ethologie von *Pipa (Hemipipa)*  
556 *carvalhoi* Mir. RiB. 1937.(Anura, Pipidae) 1. *Zeitschrift für Tierpsychologie* **40**: 80-99.
- 557 **White TD, Anderson RA. 1994.** Locomotor patterns and costs as related to body size and  
558 form in teiid lizards. *Journal of Zoology (London)* **233**:107–128.

- 559 **Willaert B, Suyesh R, Garg S, Giri VB, Bee MA, Biju S. 2016.** A unique mating strategy  
560 without physical contact during fertilization in Bombay Night Frogs (*Nyctibatrachus*  
561 *humayuni*) with the description of a new form of amplexus and female call. *PeerJ* **4:**  
562 e2117.
- 563 **Zachariah A, Abraham RK, Das S, Jayan KC, Altig R. 2012.** A detailed account of the  
564 reproductive strategy and developmental stages of *Nasikabatrachus sahyadrensis*  
565 (Anura: Nasikabatrachidae), the only extant member of an archaic frog lineage. *Zootaxa*  
566 **3510:** 53-64.
- 567 **Zamora-Camacho FJ, Reguera S, Moreno-Rueda G. 2014.** Bergmann's Rule rules body  
568 size in an ectotherm: heat conservation in a lizard along a 2200-metre elevational  
569 gradient. *Journal of Evolutionary Biology*. **27:**2820-2828.
- 570 **Zamudio KR, Bell RC, Nali RC, Haddad CFB, Prado CP. 2016.** Polyandry, predation, and  
571 the evolution of frog reproductive modes. *The American Naturalist* **188:** S41-S61.
- 572

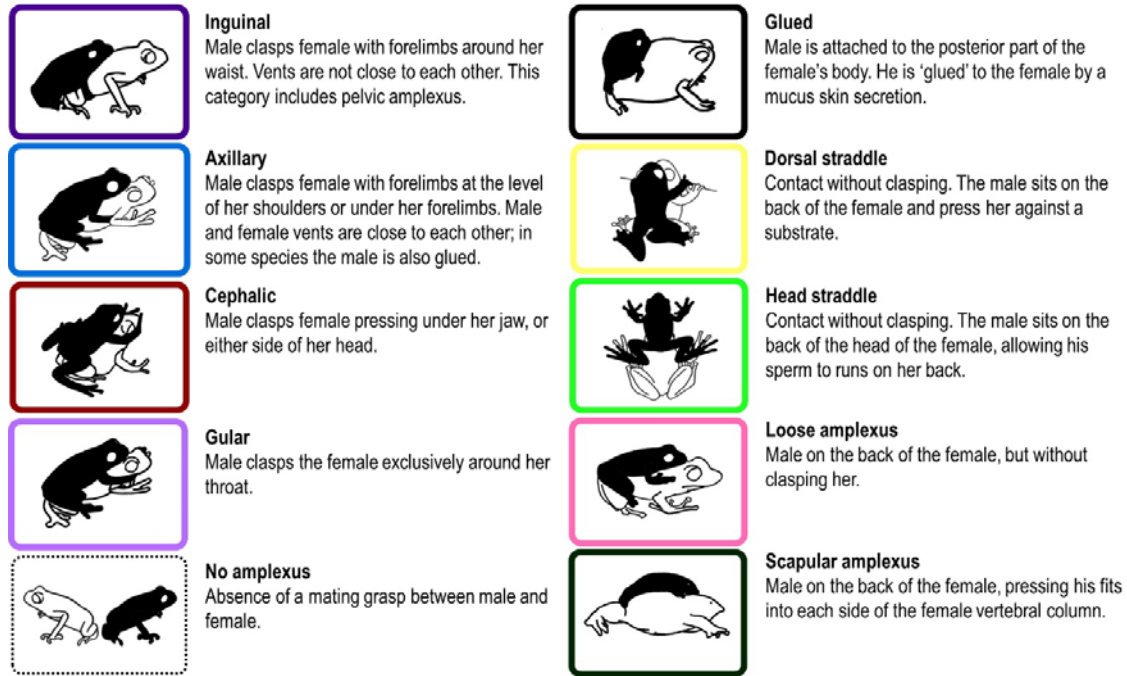

573

574 **Figure 1.** Diversity of amplexic positions in anurans (males in black color). Definitions  
575 according to Blommers-Schlösser (1975), Townsend & Stewart (1986), Duellman & Trueb  
576 (1986), Wells (2007), Zachariah *et al.*, (2012), Jungfer *et al.*, (2013) and Willeart *et al.*,  
577 (2016). Because descriptions of some amplexus types are not clear or are ambiguous, we  
578 pooled the category “Independent” (cited by Duellman & Trueb, 1986), as “No amplexus”.  
579 Frame colors make references to the same amplexus types shown in Fig. 2 and 3.

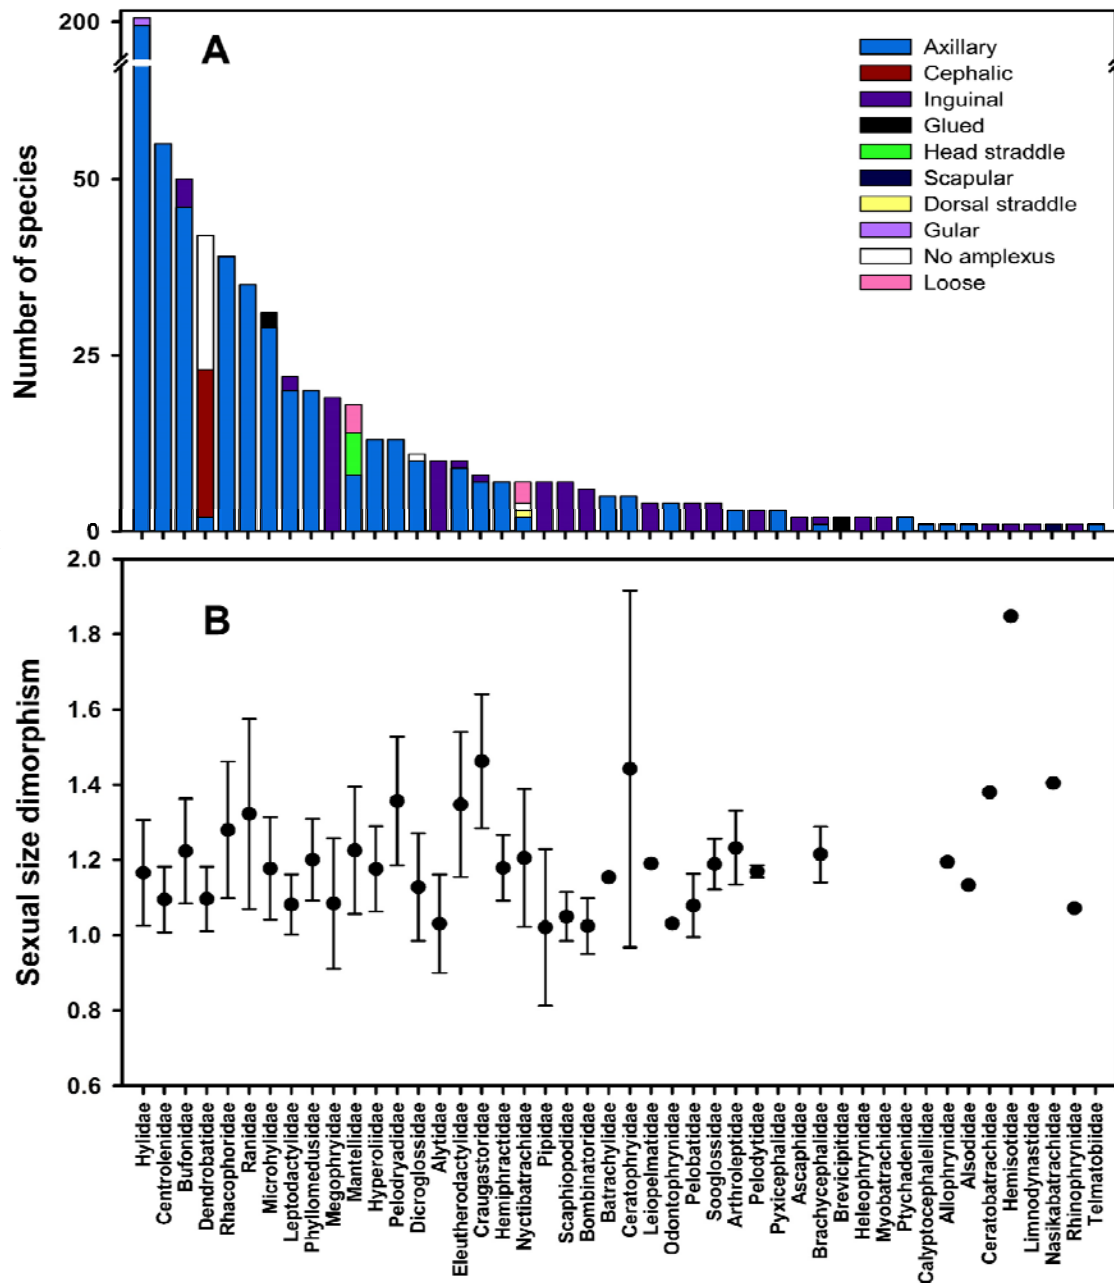

580

581 **Figure 2.** A. Summary of the number (686) of anuran species, type of amplexus (or lack  
582 thereof), and B. sexual size dimorphism (female-to-male snout-vent length ratio; SSD) per  
583 Family of Anura included in this study. Plot based on data from Table S1. Dots and bars in  
584 the plot B indicate mean values and standard deviation, respectively; for some families was  
585 not possible to calculate SSD because absence of data for female or male body size.

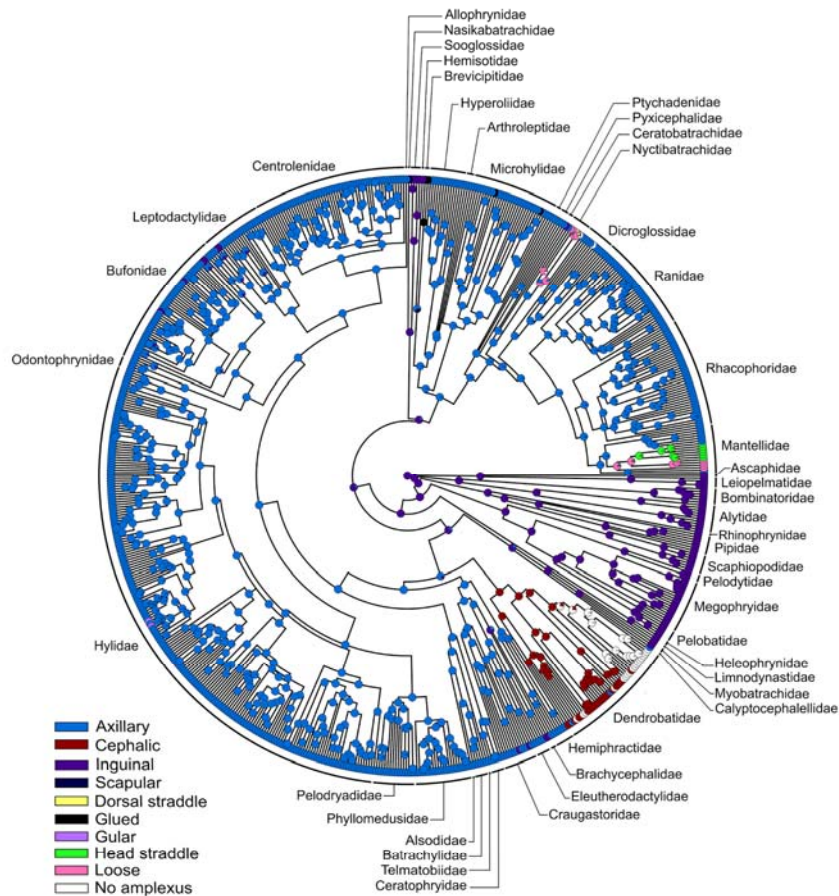

586

587 **Figure 3.** Ancestral reconstruction of amplexus type using 1000 trees for 686 anuran species  
588 under an “equal rates” model of trait evolution. Tips represent actual type of amplexus for  
589 each species and nodes represent the probability of each type of amplexus (Table S2 for  
590 specific values). Phylogenetic tree from Jetz & Pyron (2018).

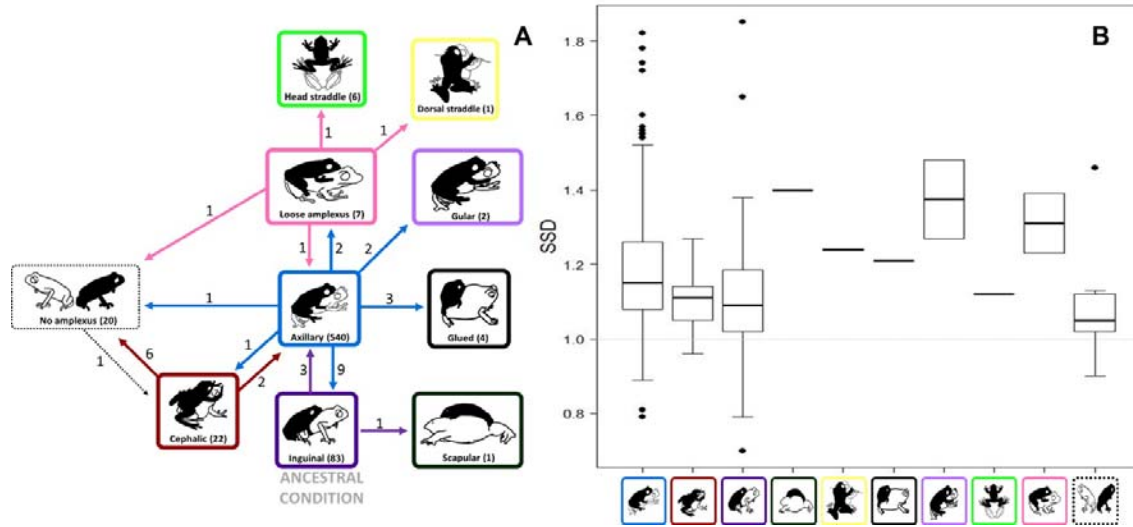

591

592 **Figure 4. A.** Estimated number of independent evolutionary transitions in type of amplexus  
 593 for the 686 anuran species included in this study. In parentheses are pointed the number of  
 594 species with each type of amplexus. Estimates are based on 1000 phylogenetic trees, and an  
 595 ancestral state reconstruction performed with phytools packages (see Fig. 2 and text for  
 596 details). **B.** Variation in sexual size dimorphism (female-to-male snout-vent length ratio,  
 597 SSD) in 478 species with different types of amplexus. Phylogenetic ANOVA: ( $F = 1.2086$ ,  $P$   
 598  $= 0.4215$ ,  $n = 478$ ).

599

600

601 **Figure S1.** Axillary amplexus in species under different microhabitat conditions (Arboreal,  
602 Terrestrial, Aquatic). **A.** *Atelopus faveszens* (Bufonidae), **B.** *Centrolene savagei*  
603 (*Centrolenidae*), **C.** *Ceratophrys calcarata* (Ceratophryidae), **D.** *Dendropsophus triangulum*  
604 (Hylidae), **E.** *Engystomops pustulosus* (Leptodactylidae), **F.** *Agalychnys callidryas*  
605 (Phyllomedusidae), **G.** *Pristimantis orpacobates* (Pristimantidae), **H.** *Lithobates vaillanti*  
606 (Ranidae). Pictures by B Rojas (A), F Vargas-Salinas (B,D,E,G,H), LA Rueda-Solano (C),  
607 and AM Ospina-L (F).

608

609
